# Supplementary material for: Preliminary study on Bioassay of Capparis spinosa L. seed extract and seed germination
Source: PeerJ journal article supplement (doi:10.7717/peerj.15082), 2023-03-14
Supplement: Supplementary_files_1.zip [file Supplementary_files_1.zip]

## Sheet: Water extract
CK(distilled water)	Root length	Bud length	25%water extract	Root length	Bud length	50%water extract	Root length	Bud length	70%water extract	Root length	Bud length	100%water extract	Root length	Bud length	Extract 1	Root length	Bud length	Extract 2	Root length	Bud length	Extract 3	Root length	Bud length
Repeat 1	1.73	2.53	Repeat 1	0.972	1.93	Repeat 1	1.8	1.766	Repeat 1	1.3	2.04	Repeat 1	0.74	1.71	Repeat 1	0.5	1.55	Repeat 1	2.2	2.8	Repeat 1	7.026	2.226
Repeat 2	3.1	1.55	Repeat 2	2.8	2.06	Repeat 2	2.42	3.05	Repeat 2	2.118	2.508	Repeat 2	1.05	1.56	Repeat 2	1.24	1.95	Repeat 2	6.6	2.73	Repeat 2	1.338	2.66
Repeat 3	2.53	2.69	Repeat 3	3.7	2.1	Repeat 3	1.5	2.65	Repeat 3	0.736	2.19	Repeat 3	0.52	1.864	Repeat 3	1.07	2.1	Repeat 3	1	3.08	Repeat 3	7.02	2.41
Repeat 4	2.97	3.53	Repeat 4	0.64	3.17	Repeat 4	0.748	1.88	Repeat 4	1.38	1.932	Repeat 4	0.052	1.726	Repeat 4	1.31	1.95	Repeat 4	3.3	3.168	Repeat 4	1.86	1.98
Repeat 5	2.7	3.81	Repeat 5	0.8	2.64	Repeat 5	2.446	1.47	Repeat 5	1.53	2.15	Repeat 5	1.3	1.804	Repeat 5	0.4	2.71	Repeat 5	1.26	2.51	Repeat 5	1.032	3.18
Repeat 6	1.88	3.1	Repeat 6	1.14	2.3	Repeat 6	3.2	2.66	Repeat 6	1.2	2.462	Repeat 6	2.516	1.52	Repeat 6	0.908	1.75	Repeat 6	2.46	3.07	Repeat 6	3.082	2.67
Repeat 7	1.94	2.52	Repeat 7	0.77	2.1	Repeat 7	1.666	2.526	Repeat 7	2.55	2.26	Repeat 7	0.56	2.62	Repeat 7	0.3	2.25	Repeat 7	1.06	2.46	Repeat 7	2.06	2.02
Repeat 8	3.8	3.2	Repeat 8	1.38	1.726	Repeat 8	0.94	2.55	Repeat 8	1	2.48	Repeat 8	0.9	2.47	Repeat 8	4.01	1.98	Repeat 8	1	1.972	Repeat 8	2.52	2.216
Repeat 9	1.04	3.67	Repeat 9	2.4	2.32	Repeat 9	0.75	1.37	Repeat 9	0.624	2.118	Repeat 9	0.894	2.366	Repeat 9	1.24	2.35	Repeat 9	2.25	2.36	Repeat 9	1.064	2.422
Repeat 10	1.9	2.3	Repeat 10	0.59	2.2	Repeat 10	2.25	2.198	Repeat 10	1.244	1.324	Repeat 10	0.576	1.464	Repeat 10	1.15	2.1	Repeat 10	0.65	3.15	Repeat 10	1.216	3.1
Repeat 11	1.7	2.95	Repeat 11	1.18	3.58	Repeat 11	2.2	2.15	Repeat 11	1.426	2.35	Repeat 11	0.462	1.66	Repeat 11	2.02	2	Repeat 11	2.6	3.418	Repeat 11	0.7	2.93
Repeat 12	1	2.69	Repeat 12	2.23	3.1	Repeat 12	0.452	2.03	Repeat 12	1.53	2.77	Repeat 12	0.92	1.71	Repeat 12	0.5	2.32	Repeat 12	1.68	2.45	Repeat 12	0.65	3.219
Repeat 13	2.48	3	Repeat 13	1.96	2.668	Repeat 13	0.5	2.16	Repeat 13	1.2	2.65	Repeat 13	0.56	2.5	Repeat 13	1.08	1.88	Repeat 13	2.4	2.4	Repeat 13	0.936	2.912
Repeat 14	1.48	2.45	Repeat 14	4.16	2.91	Repeat 14	0.46	1738	Repeat 14	1.09	2.72	Repeat 14	0.44	1.96	Repeat 14	1.54	2	Repeat 14	0.84	3.02	Repeat 14	0.628	2.61
Repeat 15	2.14	3.43	Repeat 15	1.276	2.56	Repeat 15	0.57	1.5	Repeat 15	0.824	2.334	Repeat 15	1.8	2.2	Repeat 15	0.7	1.29	Repeat 15	0.9	2.96	Repeat 15	1.4	3.12
Repeat 16	2.5	2.95	Repeat 16	2.13	3.02	Repeat 16	0.6	2.2	Repeat 16	0.98	1.88	Repeat 16	0.824	1.73	Repeat 16	0.34	1.88	Repeat 16	0.89	2.96	Repeat 16	0.88	1.5
Repeat 17	0.79	3.15	Repeat 17	1.69	3.3	Repeat 17	2.95	2.02	Repeat 17	1.69	2.2	Repeat 17	0.52	1.624	Repeat 17	8.044	1.8	Repeat 17	0.72	2.8	Repeat 17	1.31	1.96
Repeat 18	2.35	2.8	Repeat 18	2.4	2.47	Repeat 18	1.158	3.9	Repeat 18	1.5	2.08	Repeat 18	1.894	1.58	Repeat 18	1.05	1.4	Repeat 18	1.9	2.16	Repeat 18	1.9	3.21
Repeat 19	3.1	1.57	Repeat 19	1.77	2.5	Repeat 19	1.6	2.6	Repeat 19	1.15	2.786	Repeat 19	0.452	1.93	Repeat 19	1.17	1.6	Repeat 19	1.7	2.3	Repeat 19	0.87	1.864
Repeat 20	3	2.16	Repeat 20	2.1	2.54	Repeat 20	2	2.494	Repeat 20	2.264	1.884	Repeat 20	1.01	2.18	Repeat 20	0.678	1.5	Repeat 20	1.1	2.48	Repeat 20	0.58	2.472
Repeat 21	1.29	1.19	Repeat 21	1.1	3.28	Repeat 21	1.6	2	Repeat 21	0.4	2.94	Repeat 21	0.55	1.55	Repeat 21	1	1.95	Repeat 21	1.4	3.1	Repeat 21	2.08	3.12
Repeat 22	1.46	1.25	Repeat 22	1.25	2.27	Repeat 22	3.03	2.66	Repeat 22	0.442	1.82	Repeat 22	0.8	1.9	Repeat 22	1.17	1.42	Repeat 22	1.08	2.606	Repeat 22	1.08	3.92
Repeat 23	1.97	2.8	Repeat 23	1.44	2.68	Repeat 23	1.2	3.06	Repeat 23	0.69	1.86	Repeat 23	0.62	1.03	Repeat 23	0.58	1.7	Repeat 23	1.08	1.62	Repeat 23	0.5	2.606
Repeat 24	1.65	2.59	Repeat 24	2.51	2.57	Repeat 24	3.57	1.678	Repeat 24	3.87	3	Repeat 24	0.85	1.25	Repeat 24	2.78	1.37	Repeat 24	0.53	2.08	Repeat 24	3.01	4.096
Repeat 25	2.6	3.6	Repeat 25	0.52	1.43	Repeat 25	1.03	2.67	Repeat 25	1.04	2.344	Repeat 25	0.888	1.624	Repeat 25	1.118	2	Repeat 25	1.5	2.49	Repeat 25	5.05	3.38
Repeat 26	3	3	Repeat 26	1.58	2.04	Repeat 26	2.77	2.22	Repeat 26	1.776	1.916	Repeat 26	0.84	1.93	Repeat 26	0.45	1.29	Repeat 26	0.78	3.83	Repeat 26	1.046	1.608
Repeat 27	1.6	2.95	Repeat 27	0.85	2.93	Repeat 27	1.1	2.5	Repeat 27	1.2	1.54	Repeat 27	0.94	1.93	Repeat 27	0.734	1.31	Repeat 27	0.6	2.746	Repeat 27	1.16	3.5
Repeat 28	1.72	3.36	Repeat 28	3.334	2.42	Repeat 28	1.7	2.658	Repeat 28	1.17	1.47	Repeat 28	0.792	2.36	Repeat 28	0.74	1.55	Repeat 28	1.11	1.51	Repeat 28	1.1	3.36
Repeat 29	1.53	3.4	Repeat 29	1.72	2.5	Repeat 29	1.77	1.776	Repeat 29	1.22	1.334	Repeat 29	0.892	1.256	Repeat 29	0.65	1.43	Repeat 29	1.05	2.29	Repeat 29	0.66	3.23
Repeat 30	1.9	2.04	Repeat 30	1.84	2.62	Repeat 30	0.52	2.55	Repeat 30	1.4	2.08	Repeat 30	0.75	1.71	Repeat 30	1.58	1.04	Repeat 30	3.12	1.56	Repeat 30	0.944	3.59
Germination rate
CK(distilled water)	25%water extract	0.5	0.75	1	Extract 1	Extract 2	Extract 3
0.96	0.88	0.82	0.58	0.74	0.8	0.84	0.96
0.84	0.86	0.8	0.78	0.78	0.84	0.86	0.9
0.86	0.84	0.8	0.84	0.58	0.86	0.9	0.86

## Sheet: Methanol extract
Germination rate
CK(methanol)	25%methanol extract	0.5	0.75	1
0.08	0.08	0.06	0.08	0.1
0.16	0.12	0.02	0.08	0.04
0.2	0.22	0.06	0.1	0.04
